# Supplementary material for: Distinguishing magnetic and electrostatic interactions by a Kelvin probe force microscopy–magnetic force microscopy combination
Source: publisher site journal article supplement (doi:10.3762/bjnano.2.59), 2011-09-07

## Supporting Information

for

### Distinguishing magnetic and electrostatic interactions by a Kelvin probe force microscopy–magnetic force microscopy combination

Miriam Jaafar<sup>1,2</sup>, Oscar Iglesias-Freire<sup>1</sup>, Luis Serrano-Ramón<sup>3,4</sup>, Manuel Ricardo Ibarra<sup>3,4,5</sup>, Jose Maria de Teresa<sup>3,4,5</sup> and Agustina Asenjo<sup>\*1</sup>

Address: <sup>1</sup>Instituto de Ciencia de Materiales de Madrid, CSIC, Madrid, 28049, Spain; <sup>2</sup>Dpto. Física de la Materia Condensada, Universidad Autónoma de Madrid, Madrid, 28049, Spain; <sup>3</sup>Instituto de Ciencia de Materiales de Aragón, Universidad de Zaragoza-CSIC, Zaragoza, 50009, Spain; <sup>4</sup>Dpto. Física de la Materia Condensada, Universidad de Zaragoza-CSIC, Zaragoza, 50009, Spain and <sup>5</sup>Laboratorio de Microscopías Avanzadas (LMA), Instituto de Nanociencia de Aragón (INA), Universidad de Zaragoza, Zaragoza, 50018, Spain

Email: Agustina Asenjo - [aasenjo@icmm.csic.es](mailto:aasenjo@icmm.csic.es)

\* Corresponding author

#### MFM images

Variable Field MFM images of a single “L-shaped” nanostructure. During the magnetic imaging process the electrostatic force is compensated by Kelvin Probe Force Microscopy (inset images). The magnetic field is continuously applied in plane direction (see arrows): (a) as-prepared under 0 Oe; (b) -6 Oe; (c) -60 Oe; (d) +100 Oe; (e) +180 Oe and (f) 0 Oe. Image parameters:  $A = 8.5$  nm,  $\omega_0 = 73.83$  Hz and a scan rate of 0.74 Hz. The color scale of the images is 5 Hz for the MFM and 0.7 V for the surface potential. Notice that we can follow the magnetization process of this structure from a complex domain configuration (a) to a single domain state (c and f).

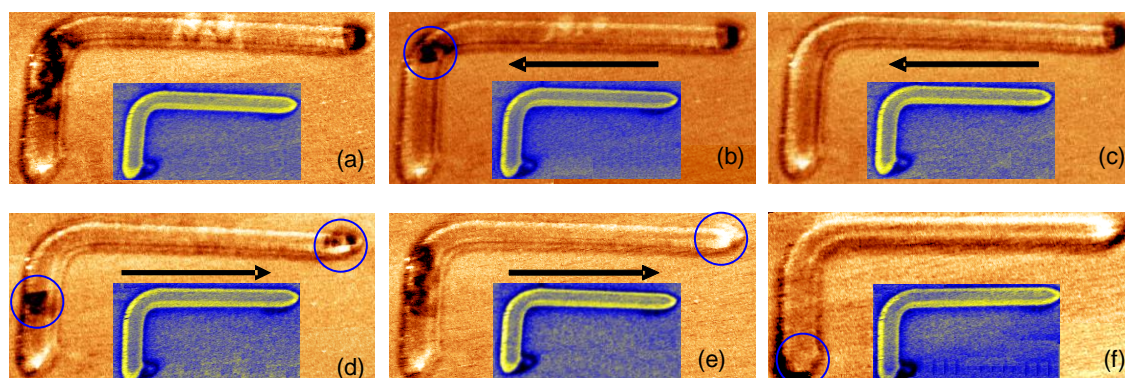

Supplement: Additional file 2 [file 2190-4286-2-59-S2.pdf]
